# Supplementary material for: Micro Milled Microfluidic Photoionization Detector for Volatile Organic Compounds
Source: MDPI journal article supplement (doi:10.3390/mi10040228), 2019-03-30
Supplement: s1 [file s1]

# Micro Milled Microfluidic Photoionization Detector for Volatile Organic Compounds

Gustavo C. Rezende, Stéphane Le Calvé, Jürgen J. Brandner and David Newport

Leakage for experiments with channel 1, channel 2 and channel 3 using nitrogen at different flow rates:

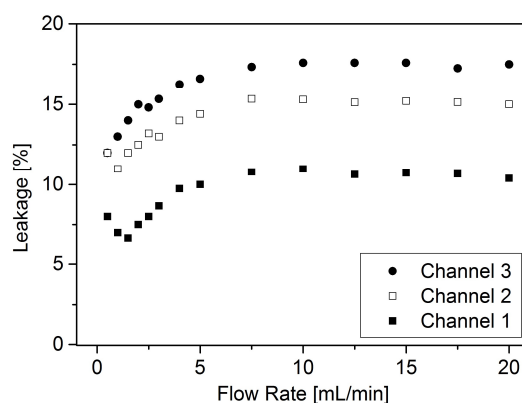

**Figure S1.** Leakage for three channel designs. Uncertainty varies from 1% at high flow rates to 5% at low flow-rates.

$$\text{Leakage [\%]} = \frac{(\text{Inlet flow rate}) - (\text{outlet flow rate})}{(\text{Inlet flow rate})} \times 100$$
